# Supplementary material for: Intestinal CD11b+ B Cells Ameliorate Colitis by Secreting Immunoglobulin A
Source: PubMed Central journal article supplement (PMC8595478; doi:10.3389/fimmu.2021.697725), 2021-11-03
Supplement: DataSheet_1.pdf [file DataSheet_1.pdf]

## Supplemental Information

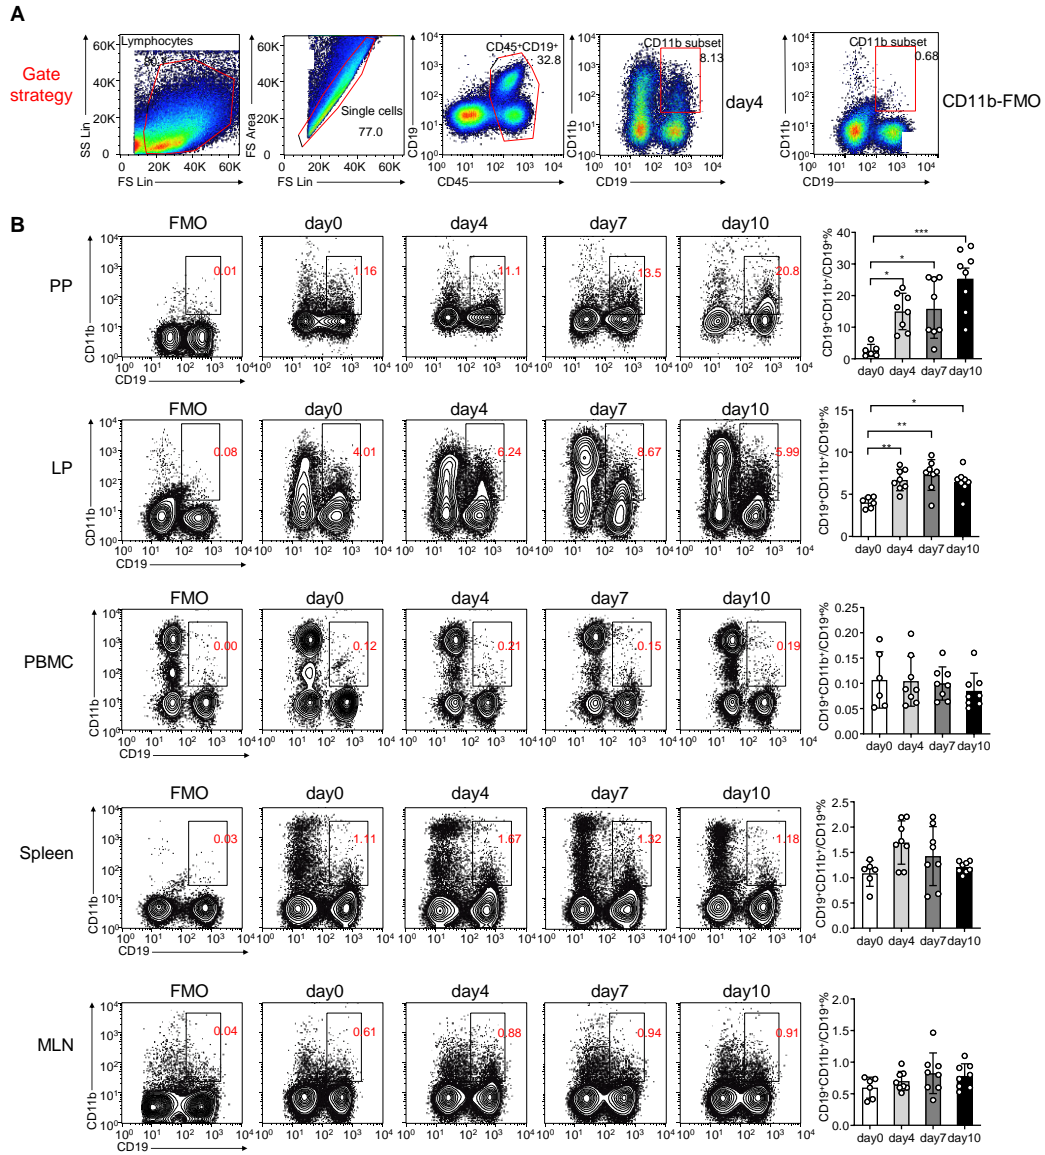

**Figure S1. CD11b is induced in Peyer's patches and colorectal LP lymphocytes during DSS-induced colitis.**

Flow cytometry was used to analyze the frequency of CD11b expression in CD45<sup>+</sup> cells.

(A). Gating strategy for the identification of CD45<sup>+</sup> cells in GALT. Representative data from LP of colitis mouse on Day 4 after DSS induced stained with different fluorochrome-labeled isotype control antibodies or anti-CD45, CD19, and CD11b antibodies. Numbers indicate the percentage of positive cells. Right panel is the CD11b fluorescence minus one (FMO) staining. (B). Cells were isolated from the Peyer's patches (PP), the colorectal lamina propria (LP), peripheral Blood Mononuclear Cell

(PBMC), spleen, and the mesenteric lymph node (MLN) of DSS-induced WT mice on days 0, 4, 7, and 10. \*\*P < 0.01; \*\*\*P < 0.001. Data shown are the mean ± SEM from one experiment with six to eight mice, performed in triplicate with similar results.

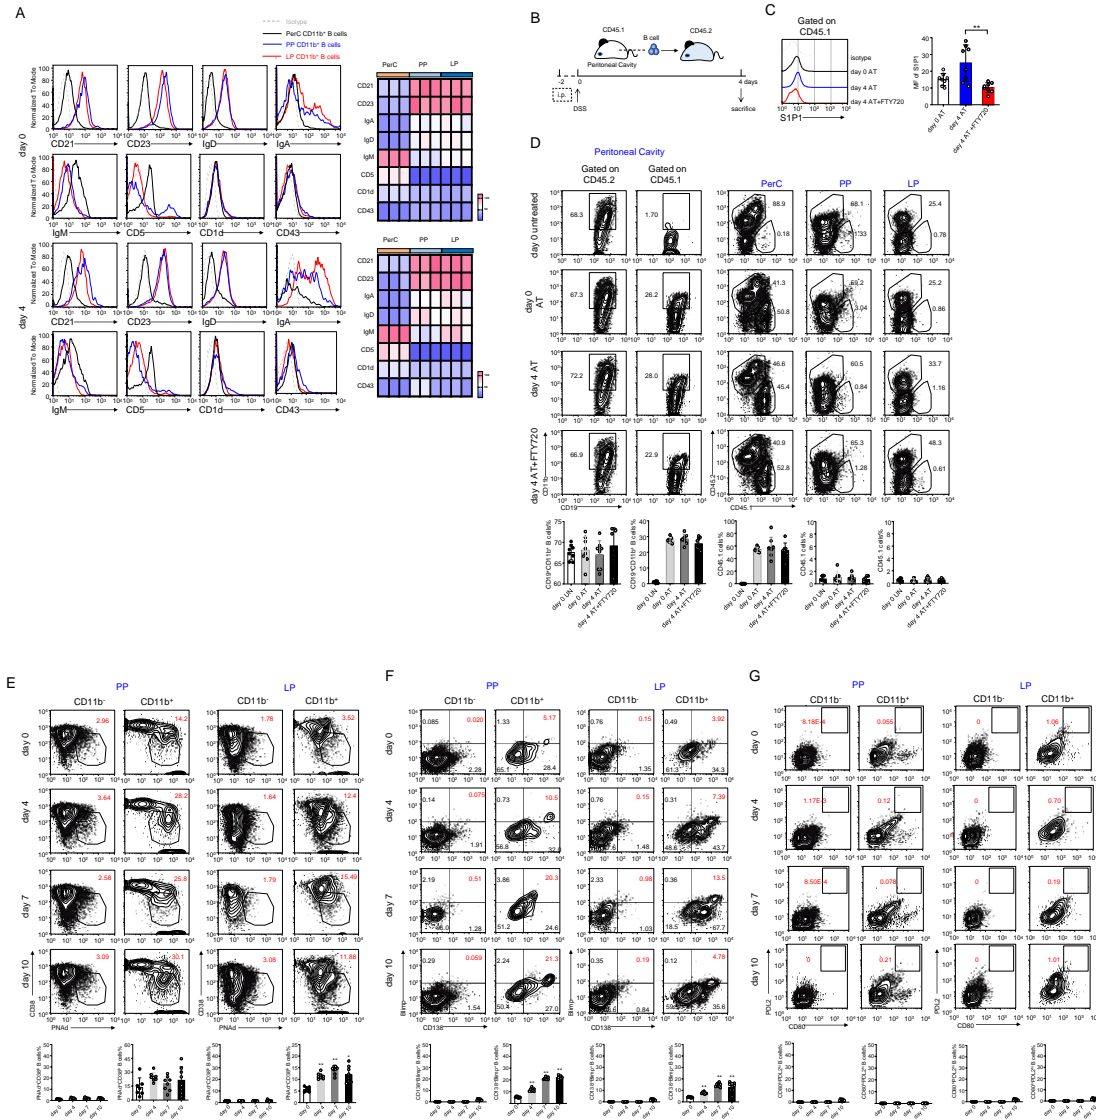

**Figure S2. Expression profile in intestinal B cells during DSS-induced colitis.**

(A). Differential markers on CD11b<sup>+</sup> B cell gated in PerC, PPs, and LP were detected through flow cytometry (left panel). Heat maps show the profiles of surface marker (right panel). (B). PerC B1 B cells from CD45.1 mice were harvested and intraperitoneally injected into CD45.2 WT mice. Subsequently, the CD45.2 WT mice were treated with DSS for 4 days. The mice were divided into PBS-injected (day 4), CD45.1 B cell-transferred (day 4 AT), and CD45.1 B cell-transferred with

intraperitoneal injection of FTY720 (day 4 AT + FTY720) groups. The FTY720 (1mg/kg) was intraperitoneal injected every day until sacrificed. **(C)**. The expression of S1P1 in PerC cells was detected through flow cytometry. **(D)**. The CD45.1 or CD45.2 CD11b<sup>+</sup> B cells of PerC, PP, or LP were detected through flow cytometry. The surface markers of CD11b<sup>-</sup> B cells and CD11b<sup>+</sup> B cells in LP and PP from day 0 to day 10 after DSS induction were detected by flow cytometry to verify the germinal center B cells **(E)**, plasmablast**(F)** and memory B cells**(G)** markers. \*\*P < 0.01. Data shown are the mean ± SEM of seven mice or more.

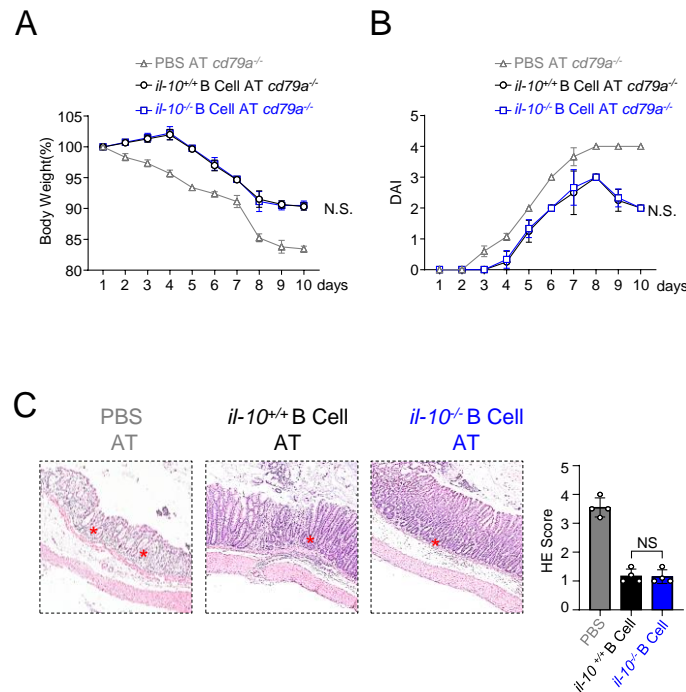

**Figure S3. Adoptively transferring of *il-10*<sup>-/-</sup> mice CD11b<sup>+</sup> B cells**

PP-derived CD11b<sup>+</sup>B cells of WT mice or *Il-10*<sup>-/-</sup> mice were sorted and intravenously injected ( $2 \times 10^7$  cells per mice) into *Cd79a*<sup>-/-</sup> mouse 2 days before of the DSS induction. Weight loss **(A)** and the DAI scores. **(B)** of the recipient mice were measured and evaluated from day 0 to day 10. **(C)**. Colon tissues from the recipient mice on days 7 after the induction of colitis, H&E-stained histological sections of distal colon tissue is shown. Images are shown at original magnification  $\times 100$ . A red asterisk indicates the position of the histological injury.

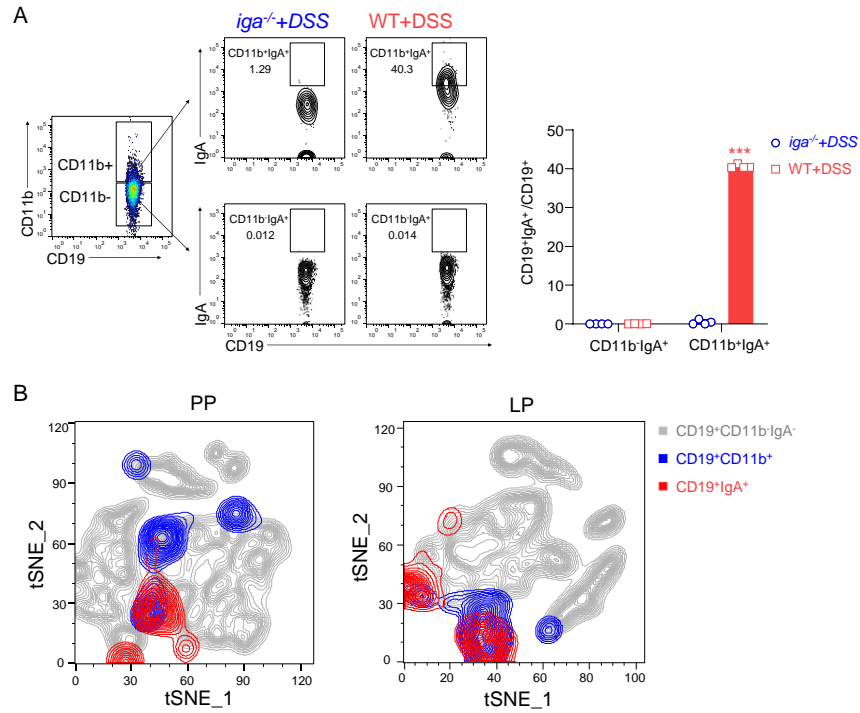

**Figure S4. IgA<sup>+</sup> cells was observed in CD11b<sup>+</sup> B cells**

(A). The expression level of IgA in CD11b<sup>+</sup> B cells and CD11b<sup>-</sup> B cells in PPs from DSS-treated *Iga*<sup>-/-</sup> mice and WT mice. (B). The t-Distributed Stochastic Neighbor Embedding (tSNE) clustering visualization of B cells of PPs and LPs from DSS-treated WT mice at day7. \*\*\*P < 0.001. Data are expressed as mean ± SEM of four mice.

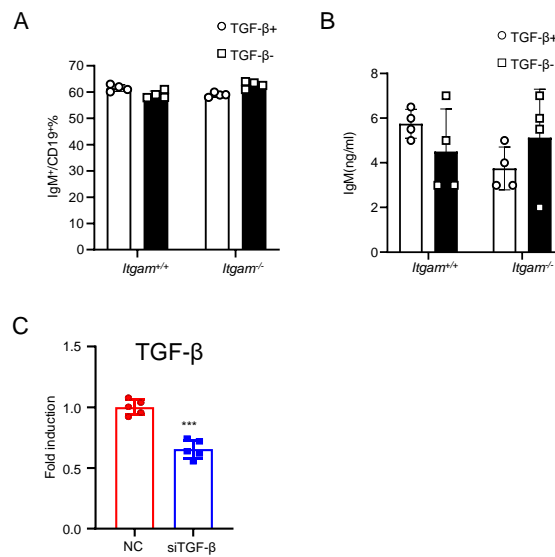

**Figure S5. The expression of IgM in *Itgam*<sup>+/+</sup> and *Itgam*<sup>-/-</sup> B cells using an in vitro assay.**

(A). Purified PPs-derived *Itgam*<sup>+/+</sup> and *Itgam*<sup>-/-</sup> B cells were stimulated with or without TGF- $\beta$  for 72 h. IgM<sup>+</sup> cells were detected using flow cytometry. (B). The production of sIgM was detected by ELISA. (C). The mRNA expression of TGF- $\beta$  at 72h after siRNA transfection with the LPS and BAFF stimulation. \*\*\*P < 0.001. Data are expressed as mean  $\pm$  SEM of five mice.

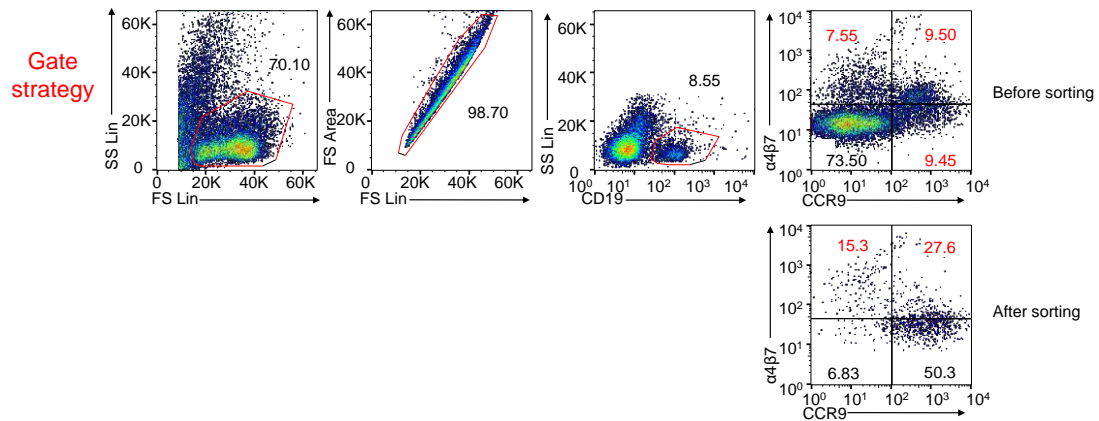

**Figure S6. FACS purified gut specific B cells**

PBMC CCR9 and/or  $\alpha 4\beta 7$  were FACS purified and representative dot plots before and after sorting are shown. Cells were stained combinations of anti-CD19, CCR9 and  $\alpha 4\beta 7$  or their isotype-matched controls.

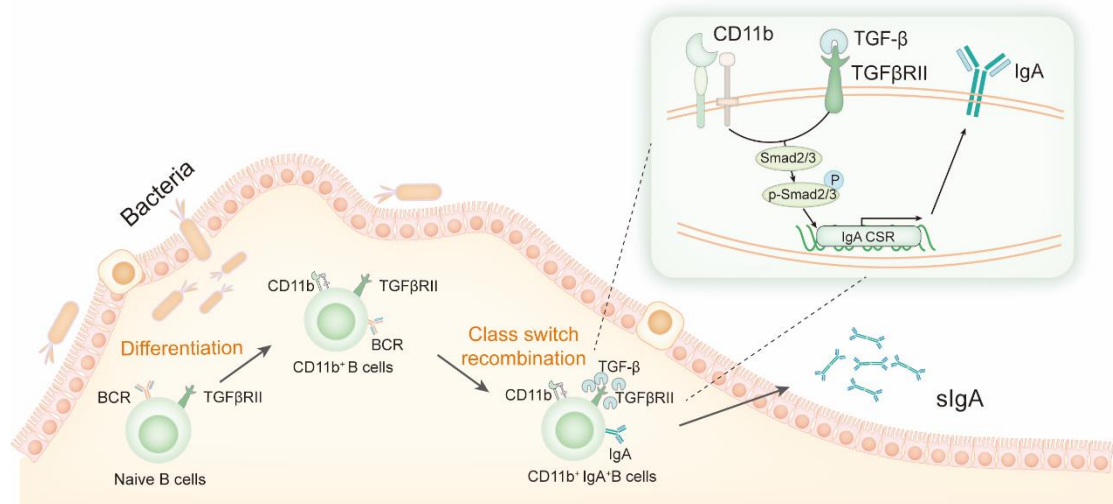

**Figure S7. A schematic view of the GALT CD11b<sup>+</sup> B cell differentiation and function.**
